# Supplementary material
Source: Springer Nature journal article supplement (https://www.springermedizin.de/resource/supplementary/12885_2013_4278_MOESM1_ESM.pdf/9466802)
Supplement: MOESM1 [file 9466802]

Potentially relevant publications identified from Medline, PsycINFO, Current Contents, Embase, CINAHL and Scopus for years 2001-2011  
**(Publications n=671)**

Excluded, research methodology did not meet inclusion criteria  
**(Publications n=378)**

- Literature reviews, editorials, commentaries and protocols (n=161)
- Reported qualitative research (n=40)
- Used a Delphi process (n=16)
- Focused on cancer screening (n=53)
- Used medical record data (n=108)

Publications limited to self-report surveys  
**(Publications n=293)**

Excluded, sample did not meet inclusion criteria  
**(Publications n=130)**

- Patients less than 18 years old (n=1)
- Patients with advanced cancer (n=37)
- Surveyed health providers (n=48)
- Surveyed caregivers (n=44)

Publications limited to surveyed adult cancer patients  
**(Publications n=163)**

Excluded, did not describe development of patient-centred measures  
**(Publications n=121)**

- Reported prevalence data only (n=121)

Publications limited to development and validation of original patient-centred measure  
**(Publications n=42)**

Excluded, ineligible timeframe or language  
**(Publications n=15)**

- Re-validation of measure that was not eligible for review (n=14)
- Publication not in English (n=1)

27 publications eligible for review  
**21 unique measures identified**
